1 Short Communication

2 **Rift Valley fever virus minigenome system for investigating the role of L protein residues in**  
3 **viral transcription and replication**

4  
5 Hanna Jérôme<sup>1</sup>, Martin Rudolf<sup>1</sup>, Michaela Lelke<sup>1</sup>, Meike Pahlmann<sup>1</sup>, Carola Busch<sup>1</sup>, Sabrina  
6 Bockholt<sup>1</sup>, Stephanie Wurr<sup>1</sup>, Stephan Günther<sup>1,2\*</sup>, Maria Rosenthal<sup>1&</sup>, Romy Kerber<sup>1,2&</sup>

7  
8 <sup>1</sup> Department of Virology, Bernhard Nocht Institute for Tropical Medicine, Hamburg, Germany

9 <sup>2</sup> German Center for Infection Research (DZIF), Partner site Hamburg – Lübeck – Borstel – Riems,  
10 Hamburg, Germany

11 \* Corresponding author, E-mail: [guenther@bni.uni-hamburg.de](mailto:guenther@bni.uni-hamburg.de) (SG)

12 & These senior authors contributed equally to this work.

13  
14 **Abstract**

15 Replicon systems are important molecular tools for investigating the function of virus proteins and  
16 regulatory elements involved in viral RNA synthesis. Various such systems were previously  
17 established for segmented negative strand viruses including the Rift Valley fever virus (RVFV). We  
18 have developed an ambisense minigenome system for RVFV with the specific aim to analyze the  
19 effects of L gene mutations on viral transcription versus replication. The S RNA segment with  
20 regulatory elements for ambisense gene expression served as backbone for the minigenome.  
21 Expression of the luciferase reporter gene allowed the overall activity of the RVFV replication  
22 complex to be assessed, while northern blot analysis enabled differentiation between synthesis of  
23 viral mRNA and replication intermediates. The functionality of the system was demonstrated by  
24 probing residues predictably involved in the active site of the cap-snatching endonuclease in the N-  
25 terminus of the L protein (D111, E125, and K143). Corresponding mutations led to a selective  
26 defect in the viral mRNA synthesis as described for other viruses of the *Bunyavirales* order. The  
27 analysis of further L gene mutants revealed an essential and specific role of a C-terminal region in  
28 the RVFV L protein (residues 1680–2068) in viral transcription. In summary, the established  
29 minigenome system is suitable for functional testing of the relevance of residues for viral  
30 transcription and replication and to validate hypotheses arising from structural or biochemical  
31 investigations of the RVFV replication complex. Application of the system to a small-scale  
32 mutagenesis screen disclosed a specific role of a C-terminal region in the RVFV L protein in  
33 mRNA synthesis.

34

35 **Keywords:** negative strand RNA virus, reverse genetics, viral transcription, Rift Valley fever virus

## 36 **Introduction**

37 Rift Valley fever virus (RVFV) is an important human and animal pathogen in Sub-Saharan Africa  
38 and on the Arabian Peninsula. RVFV infections cause death and abortion in ruminants and  
39 pseudoruminants and outbreaks may be associated with a high economic burden. In humans, the  
40 virus may cause febrile illness including hemorrhagic fever with fatal outcome [1, 2]. As medical  
41 countermeasures to prevent or treat the disease in humans are lacking, it is listed on the WHO  
42 blueprint for urgent research and development [3].

43 RVFV belongs to the family of *Phenuiviridae* within the *Bunyavirales* order and contains a tri-  
44 segmented single stranded RNA genome with negative polarity. The small (S) RNA segment  
45 utilizes an ambisense coding strategy; the nucleocapsid protein (N) is encoded in antisense  
46 orientation and the non-structural protein (NSs) in sense orientation. Both genes are separated by an  
47 intergenic region (IGR). The middle and large (M and L) RNA segments contain genes for the  
48 glycoprotein precursor, the nonstructural protein NSm, and the large L protein (~250 kDa),  
49 respectively. N and L proteins together with the viral RNA constitute the viral replication complex,  
50 the structural unit for genome replication and transcription [4].

51 Several minigenome systems have been established for RVFV and were used to study the function of  
52 proteins and regulatory elements involved in RVFV genome replication and transcription [5-9].  
53 However, these systems have not been optimized for comprehensive mutagenesis studies aiming at  
54 measuring simultaneously genome replication and transcription: (i) the measurement range (i.e. the ratio  
55 between positive and negative control) of the reporter gene assay is rather small [7, 9], although  
56 performance could be improved upon depletion of cellular protein kinase R [9], (ii) the read-out requires  
57 complex experimental procedures (i.e. virus-like particle production and transfer on indicator cells,  
58 chloramphenicol acetyltransferase [CAT] assay, and/or infection with Modified Vaccinia virus Ankara  
59 expressing T7 RNA polymerase [MVA-T7]) [5, 6, 8, 9], and/or (iii) the systems require transfection of  
60 plasmids hampering generation of larger numbers of L gene mutants [6-9].

61 In this article, we report the establishment of an ambisense minigenome system for RVFV based on  
62 the viral genomic S segment. It has been designed in analogy to the T7 RNA polymerase-driven

63 minigenome system published for Lassa virus [10]. It provides a measurement range of two to three  
64 log units even after transfection of PCR products for expression of L protein, which is important for  
65 rapid and large-scale mutagenesis of the L gene. Luciferase reporter gene expression allows for  
66 assessment of the overall activity of the RVFV replication complex, while northern blot analysis of  
67 viral RNA facilitates easy discrimination between products of viral transcription and replication. A  
68 mutagenesis study for the L protein was conducted to demonstrate that the established RVFV  
69 system is suitable for studies with the aim of dissecting the molecular mechanisms of replication  
70 and transcription.

71

## 72 **Materials and methods**

### 73 **Direct sequencing of RVFV**

74 Overlapping fragments of RVFV-ZH501-BNI S, M, and L RNA, respectively, were reverse  
75 transcribed, amplified, and sequenced directly. In order to generate an S RNA based minigenome  
76 with an authentic promoter of strain ZH501-BNI, the conserved 5' and 3' termini of S RNA were  
77 sequenced as described previously [11]. In brief, purified virus RNA was treated with 5 units of  
78 tobacco acid pyrophosphatase (Epicentre) to generate 5' monophosphorylated termini.  
79 Subsequently 5' and 3' termini were ligated using 10 units of T4 RNA ligase (New England  
80 Biolabs) at 37°C for 1 h. The resulting intramolecular ligation site was reverse transcribed and  
81 amplified, and the PCR product was sequenced. Sequences of primers used can be obtained upon  
82 request. Compared to the sequences of RVFV strain ZH501 deposited in GenBank (accession  
83 numbers DQ375406, DQ380200, DQ380149), the S, M and L RNA sequences for RVFV strain  
84 ZH501-BNI show the following nucleotide (amino acid) differences: S RNA, C616A (NSs protein:  
85 C194Stop); M RNA, A715T (envelope polyprotein: Q232L), T895C (envelope polyprotein:  
86 L292P), G3614A (envelope polyprotein: Stop1198Stop).

87

## 88 **Construction of plasmids for RVFV minigenome system**

89 Vero E6 cells in 75-cm<sup>2</sup> tissue culture flasks were inoculated with RVFV-ZH501-BNI. After 4  
90 days, the supernatant was cleared by low-speed centrifugation and virus was pelleted by overnight  
91 ultracentrifugation. The pellet was resuspended in water, and virus RNA was purified by using the  
92 QIAamp viral RNA kit (Qiagen) according to the manufacturer's instructions. Purified RNA was  
93 reverse transcribed and the resulting cDNA amplified using the Superscript III One-Step RT-PCR  
94 System with Platinum Taq (Invitrogen). Amplified RVFV genes for N and L proteins were cloned  
95 into expression vector pCITE-2a containing a T7 RNA polymerase promoter, an internal ribosomal  
96 entry site (IRES), and a favorable Kozak consensus sequence, resulting in pCITE-RVFV-N and  
97 pCITE-RVFV-L, respectively. The final sequences of N and L genes in pCITE 2a vector matched  
98 the consensus sequence of strain ZH501-BNI. The RVFV minigenome plasmid (pRVFV-MG) is  
99 based on the genomic RVFV S RNA integrated into the vector pX12ΔT [12]. The pRVFV-MG  
100 contains the T7 RNA polymerase promoter followed by a single G base, 5' untranslated region (5'-  
101 UTR) including the conserved 5' terminus, CAT gene, 3' end of the NSs gene (55 nucleotides), the  
102 IGR, 3' end of the N gene (49 nucleotides in reverse orientation), Renilla luciferase (Ren-Luc) gene  
103 in reverse orientation, 3'-UTR including the conserved 3' terminus, hepatitis delta ribozyme  
104 (HDR), and T7 RNA polymerase transcription termination sequence (T7t) (Fig 1). The sequence of  
105 RVFV IGR and flanking nucleotides of the N and NSs genes were synthesized by GeneArt  
106 (Thermo Fisher) for stepwise assembly of the complete minigenome in the pX12ΔT vector,  
107 resulting in pRVFV-MG. Correctness of all sequences was ascertained by sequencing. Sequences of  
108 primers used for cloning are available upon request.

109

## 110 **Minigenome assay**

111 Mutant L genes were generated by mutagenic PCR using pCITE-RVFV-L as a template. The PCR  
112 products containing the functional cassette for expression of mutant L protein (T7 RNA polymerase  
113 promoter, IRES, and L gene) were purified, quantified spectrophotometrically, and used for

114 transfection without prior cloning as described previously [13]. The presence of the artificial  
115 mutation was ascertained by sequencing. BSR-T7/5 cells stably expressing T7 RNA polymerase  
116 [12] were transfected per well of a 24-well plate with 250 ng of L gene PCR product, 750 ng of  
117 pRVFV-MG expressing Renilla luciferase (Ren-Luc), 500 ng of pCITE-RVFV-N expressing N  
118 protein, and 10 ng of pCITE-FF-Luc expressing firefly luciferase as an internal transfection control.  
119 All transfections were performed by use of Lipofectamine 2000 (Thermo Fisher) according to the  
120 manufacturer's instructions. At 24 h after transfection, cells were either used to purify total RNA  
121 using the RNeasy Mini Kit (Qiagen) for northern blotting, or lysed in 100 µl of passive lysis buffer  
122 (Promega) per well, and analysed for firefly luciferase and Ren-Luc activity using the Dual-  
123 Luciferase Reporter Assay System (Promega). To compensate for differences in transfection  
124 efficiency or cell density, Ren-Luc levels were corrected with the firefly luciferase levels (resulting  
125 in standardized relative light units [sRLU]). RNA (1–2 µg) was separated in a 1.5%-agarose–  
126 formaldehyde gel and transferred onto a Roti-Nylon Plus membrane (Roth) for northern blot  
127 analysis. After pre-hybridization, blots were hybridized with a <sup>32</sup>P-labeled riboprobe targeting the  
128 Ren-Luc gene (Fig 1). RNA bands were visualized by autoradiography using a Typhoon scanner  
129 (GE Healthcare).

130

### 131 **Expression of L protein**

132 To verify expression of L protein mutants, BSR-T7/5 cells in a well of a 24-well plate were  
133 transfected with 500 ng of PCR product encoding L protein mutants tagged at the C-terminus with a  
134 3xFLAG sequence. Cells were additionally inoculated with MVA-T7 [14] prior to the transfection  
135 to enhance L protein expression levels. At 24 h after transfection, cytoplasmic lysate was separated  
136 in a 3–8% Tris-acetate polyacrylamide gel, transferred to a nitrocellulose membrane (Whatman),  
137 and detected by immunoblotting using peroxidase-conjugated anti-FLAG M2 antibody (1:10,000)  
138 (A8592; Sigma-Aldrich). For visualization of the L protein bands by chemiluminescence, the

139 SuperSignal West Femto substrate (Pierce) and a FUSION SL image acquisition system (Vilber  
140 Lourmat) were used.

141

## 142 **Results and discussion**

143 Essential components for an ambisense minireplicon system for RVFV, namely L gene, N gene,  
144 and minigenome, were integrated into appropriate vectors for T7 RNA polymerase-driven  
145 expression in BSR-T7/5 cells (Fig 1). The S RNA segment containing regulatory elements for  
146 ambisense gene expression was used as backbone for the minigenome. The latter contained CAT  
147 and Ren-Luc genes in sense and antisense orientation, respectively, to measure transcriptional  
148 activity of the system, although only Ren-Luc expression, which is solely dependent on the activity  
149 of the RVFV polymerase, was measured in this study. Expression of firefly luciferase from co-  
150 transfected plasmid served as internal control for transfection efficacy. To demonstrate functionality  
151 of the system, experiments were conducted with wild-type L protein. An L protein mutant  
152 containing a mutation in the catalytic site of the RNA-dependent RNA polymerase (D1133N within  
153 the SDD motif) served as a negative control. Wild-type L protein mediated high levels of Ren-Luc  
154 expression (up to 1,500,000 light units), while the inactive mutant showed 100–1,000 fold less Ren-  
155 Luc expression. RNA products of genome replication (antigenome) and transcription (Ren-Luc  
156 mRNA) generated by the wild-type L protein were clearly visible as distinct signals in northern blot  
157 (Fig 2 and S1 Table), similar to the ambisense Lassa virus minigenome system [10, 15, 16].  
158 Transcription signals for the D1133N mutant were absent but an unspecific background signal at  
159 the antigenome position was sometimes observed on the northern blot, which was taken into  
160 account in the quantification of antigenome signal intensity. The precise nature of the unspecific  
161 material is not known, although it likely stems from spurious activity of cellular enzymes, which  
162 use either the transfected pRVFV-MG plasmid or the RNA expressed from this plasmid by T7 RNA  
163 polymerase as a template for synthesis of an "antigenome-like" RNA species. The activity of such

164 cellular enzymes may also explain background expression of Ren-Luc in the absence of a functional  
165 RVFV L protein.

166 In order to validate the RVFV minigenome system, we tested L protein mutants with exchanges of  
167 residues presumably involved in the endonuclease active site. The endonuclease domain has been  
168 located in the N-terminal ~250 residues of RVFV L protein [9] and is predictably required for viral  
169 transcription, as demonstrated for the corresponding domain of Lassa virus L protein [15, 17].  
170 Putative catalytic residues D111, E125 and K143 were selected based on amino acid alignments of  
171 RVFV with La Crosse virus and hantavirus endonuclease domains as well as prior functional and  
172 structural information on the catalytic site [9, 17-19]. Mutation of these residues to alanine resulted  
173 in a strong decrease in Ren-Luc activity (Fig 2 and S1 Table). On the northern blot, replication  
174 products were detected, whereas Ren-Luc mRNA was absent consistent with the low level of Ren-  
175 Luc activity. In summary, alanine substitution of RVFV L protein residues predictably involved in  
176 endonuclease activity led to a selective defect in viral transcription. The transcription-defective  
177 phenotype could be demonstrated using the ambisense minigenome system.

178

179 Besides the endonuclease, a cap-binding function is important for viral transcription. It has been  
180 hypothesized that the C terminus of bunyavirus L protein is involved in this function [21, 22].  
181 Furthermore, a role for the C terminus of Lassa virus L protein in viral transcription was proposed  
182 based on a mutagenesis study using the Lassa virus minigenome system [16]. A typical structural  
183 motif of the cap-binding site comprises two aromatic amino acid side chains forming a sandwich  
184 with the guanine moiety of a cap structure. Additionally, the triphosphate moiety of the cap  
185 structure is often interacting with positively charged amino acids. However, a cap-binding site does  
186 not feature a specific sequence motif; therefore it is not possible to predict residues potentially  
187 involved in cap-binding just based on sequence.

188 We used the RVFV minigenome system to investigate whether the C-terminal region of RVFV L  
189 protein might play a role in viral cap-snatching. Based on an alignment of phlebovirus L protein

190 sequences, 34 partially or completely conserved aromatic and positively charged amino acids were  
191 selected for an alanine mutation screen (S1 Fig). Ten of these residues were found to be important  
192 for transcription but not replication of the viral genome (Fig 2 and S1 Table). Four residues were  
193 aromatic or heteroaromatic (Y1728, Y1800, H1858 and F2007) and six were positively charged  
194 (K1680, K1682, K1839, R1841, R1942 and R2068). A subset of these residues was additionally  
195 modified to serine and aspartic acid. All these modifications resulted in a selective defect in mRNA  
196 synthesis, which confirmed the involvement of the C-terminal region between positions 1680 and  
197 2068 of the RVFV L protein in viral transcription (Fig 2 and S1 Table).

198

199 We developed an ambisense minigenome system for RVFV, which is suitable for screening of L  
200 gene mutations for their impact on viral transcription and replication. As a proof of principle, the  
201 system was used to probe amino acid residues potentially involved in the endonuclease active site  
202 (D111, E125, and K143). Corresponding mutations resulted in a selective defect in viral  
203 transcription, as has been reported for other viruses of the *Bunyavirales* order [15, 23].  
204 Additionally, the system facilitated identifying residues in the C-terminal region of RVFV L protein  
205 (residues 1680–2068) being important for viral transcription but not replication. However, these  
206 data is no proof for the existence of a cap-binding site. They merely demonstrate a specific role of  
207 the identified amino acids during viral transcription. Further conclusions require biochemical and  
208 structural data.

209 In summary, the established RVFV ambisense minigenome system (i) is suitable to screen L protein  
210 mutants without cloning, (ii) yields sufficient signal strength without depletion of the cellular  
211 protein kinase R [9], and (iii) allows for technically simple discrimination between viral  
212 transcription and replication. Therefore this system is well suited to validate hypotheses arising  
213 from structural or biochemical investigation of the RVFV replication complex.

214

215



216 **Author statements**

217 **Author contributions**

218 Conceptualization: SG; investigation: HJ, MRu, ML, MP, CB, SB, SW; supervision: SG, RK; data  
219 analysis: MRo, RK; visualization: MRo, RK; writing – original draft preparation: MRo, RK;  
220 writing –review & editing: SG, MRo, RK

221

222 **Conflict of interest**

223 The authors declare no conflicts of interest exist.

224

225 **Funding information**

226 This study was supported by grant GU 883/1-1 from the German Research Foundation to SG and  
227 grant 653316 (European Virus Archive goes global) from the European Community to SG. The  
228 Department of Virology of the Bernhard Nocht Institute is a WHO Collaborating Centre for  
229 Arbovirus and Haemorrhagic Fever Reference and Research (DEU-000115). The funders had no  
230 role in study design, data collection and analysis, decision to publish, or preparation of the  
231 manuscript.

232

233 **Acknowledgement**

234 We thank Martin Meyer and Beate Becker-Ziaja for excellent technical assistance. We thank  
235 Sophia Reindl for fruitful discussions and also acknowledge support by Stephanie Jansen and  
236 Stefanie Becker.

237

238 **References**

- 239 1. Ikegami T, Makino S. The pathogenesis of Rift Valley fever. *Viruses*. 2011;3(5):493-519.  
240 2. Gaudreault NN, Indran SV, Balaraman V, Wilson WC, Richt JA. Molecular aspects of Rift  
241 Valley fever virus and the emergence of reassortants. *Virus Genes*. 2018.

- 242 3. Mehand MS, Al-Shorbaji F, Millett P, Murgue B. The WHO R&D Blueprint: 2018 review  
243 of emerging infectious diseases requiring urgent research and development efforts. *Antiviral Res.*  
244 2018;159:63-7.
- 245 4. Ikegami T. Molecular biology and genetic diversity of Rift Valley fever virus. *Antiviral Res.*  
246 2012;95(3):293-310.
- 247 5. Lopez N, Muller R, Prehaud C, Bouloy M. The L protein of Rift Valley fever virus can  
248 rescue viral ribonucleoproteins and transcribe synthetic genome-like RNA molecules. *J Virol.*  
249 1995;69(7):3972-9.
- 250 6. Accardi L, Prehaud C, Di Bonito P, Mochi S, Bouloy M, Giorgi C. Activity of Toscana and  
251 Rift Valley fever virus transcription complexes on heterologous templates. *J Gen Virol.* 2001;82(Pt  
252 4):781-5.
- 253 7. Ikegami T, Peters CJ, Makino S. Rift valley fever virus nonstructural protein NSs promotes  
254 viral RNA replication and transcription in a minigenome system. *J Virol.* 2005;79(9):5606-15.
- 255 8. Gaudiard N, Billecocq A, Flick R, Bouloy M. Rift Valley fever virus noncoding regions of  
256 L, M and S segments regulate RNA synthesis. *Virology.* 2006;351(1):170-9.
- 257 9. Klemm C, Reguera J, Cusack S, Zielecki F, Kochs G, Weber F. Systems to establish  
258 bunyavirus genome replication in the absence of transcription. *J Virol.* 2013;87(14):8205-12.
- 259 10. Hass M, Golnitz U, Muller S, Becker-Ziaja B, Gunther S. Replicon system for Lassa virus.  
260 *Journal of Virology.* 2004;78(24):13793-803.
- 261 11. Meyer BJ, Southern PJ. Concurrent sequence analysis of 5' and 3' RNA termini by  
262 intramolecular circularization reveals 5' nontemplated bases and 3' terminal heterogeneity for  
263 lymphocytic choriomeningitis virus mRNAs. *J Virol.* 1993;67(5):2621-7.
- 264 12. Buchholz UJ, Finke S, Conzelmann KK. Generation of bovine respiratory syncytial virus  
265 (BRSV) from cDNA: BRSV NS2 is not essential for virus replication in tissue culture, and the  
266 human RSV leader region acts as a functional BRSV genome promoter. *J Virol.* 1999;73(1):251-9.

- 267 13. Hass M, Lelke M, Busch C, Becker-Ziaja B, Gunther S. Mutational evidence for a structural  
268 model of the Lassa virus RNA polymerase domain and identification of two residues, Gly1394 and  
269 Asp1395, that are critical for transcription but not replication of the genome. *Journal of Virology*.  
270 2008;82(20):10207-17.
- 271 14. Sutter G, Ohlmann M, Erfle V. Non-replicating vaccinia vector efficiently expresses  
272 bacteriophage T7 RNA polymerase. *FEBS Lett*. 1995;371(1):9-12.
- 273 15. Lelke M, Brunotte L, Busch C, Gunther S. An N-terminal region of Lassa virus L protein  
274 plays a critical role in transcription but not replication of the virus genome. *Journal of Virology*.  
275 2010;84(4):1934-44.
- 276 16. Lehmann M, Pahlmann M, Jerome H, Busch C, Lelke M, Gunther S. Role of the C terminus  
277 of Lassa virus L protein in viral mRNA synthesis. *J Virol*. 2014;88(15):8713-7.
- 278 17. Holm T, Kopicki JD, Busch C, Olschewski S, Rosenthal M, Uetrecht C, et al. Biochemical  
279 and structural studies reveal differences and commonalities among cap-snatching endonucleases  
280 from segmented negative-strand RNA viruses. *J Biol Chem*. 2018;293(51):19686-98.
- 281 18. Fernandez-Garcia Y, Reguera J, Busch C, Witte G, Sanchez-Ramos O, Betzel C, et al.  
282 Atomic Structure and Biochemical Characterization of an RNA Endonuclease in the N Terminus of  
283 Andes Virus L Protein. *PLoS Pathog*. 2016;12(6):e1005635.
- 284 19. Reguera J, Gerlach P, Rosenthal M, Gaudon S, Coscia F, Gunther S, et al. Comparative  
285 Structural and Functional Analysis of Bunyavirus and Arenavirus Cap-Snatching Endonucleases.  
286 *PLoS Pathog*. 2016;12(6):e1005636.
- 287 20. Rueden CT, Schindelin J, Hiner MC, DeZonia BE, Walter AE, Arena ET, et al. ImageJ2:  
288 ImageJ for the next generation of scientific image data. *BMC Bioinformatics*. 2017;18(1):529.
- 289 21. Reguera J, Weber F, Cusack S. Bunyaviridae RNA polymerases (L-protein) have an N-  
290 terminal, influenza-like endonuclease domain, essential for viral cap-dependent transcription. *PLoS*  
291 *Pathog*. 2010;6(9):e1001101.

- 292 22. Ferron F, Weber F, de la Torre JC, Reguera J. Transcription and replication mechanisms of  
293 Bunyaviridae and Arenaviridae L proteins. *Virus Res.* 2017;234:118-34.
- 294 23. Morin B, Coutard B, Lelke M, Ferron F, Kerber R, Jamal S, et al. The N-terminal domain of  
295 the arenavirus L protein is an RNA endonuclease essential in mRNA transcription. *PLoS Pathog.*  
296 2010;6(9):e1001038.
- 297 24. Simossis VA, Heringa J. PRALINE: a multiple sequence alignment toolbox that integrates  
298 homology-extended and secondary structure information. *Nucleic Acids Research.* 2005;33(Web  
299 Server issue):W289-94.
- 300 25. Sievers F, Wilm A, Dineen D, Gibson TJ, Karplus K, Li W, et al. Fast, scalable generation  
301 of high-quality protein multiple sequence alignments using Clustal Omega. *Mol Syst Biol.*  
302 2011;7:539.
- 303 26. McWilliam H, Li W, Uludag M, Squizzato S, Park YM, Buso N, et al. Analysis Tool Web  
304 Services from the EMBL-EBI. *Nucleic Acids Res.* 2013;41(Web Server issue):W597-600.
- 305 27. Bawono P, Heringa J. PRALINE: a versatile multiple sequence alignment toolkit. *Methods*  
306 *Mol Biol.* 2014;1079:245-62.
- 307 28. Robert X, Gouet P. Deciphering key features in protein structures with the new ENDscript  
308 server. *Nucleic Acids Res.* 2014;42(Web Server issue):W320-4.
- 309 29. Drozdetskiy A, Cole C, Procter J, Barton GJ. JPred4: a protein secondary structure  
310 prediction server. *Nucleic Acids Res.* 2015;43(W1):W389-94.

311

## 312 **Figures and tables**

313 **Fig 1. The RVFV ambisense minigenome system.** The upper part of the figure schematically  
314 displays the minigenome system constructs as used for transfection into BSR-T7/5 cells. The  
315 system comprises the RVFV minigenome plasmid pRVFV-MG based on RVFV S RNA, the  
316 plasmid for expression of the N protein (pCITE-RVFV-N), and the PCR products for expression of  
317 the L protein (RVFV-L-PCR). Plasmid pCITE-FF expressing firefly luciferase serves as a

318 transfection control (not depicted). Functional elements are abbreviated as follows: T7p, T7 RNA  
319 polymerase promoter; IRES, internal ribosomal entry site; UTR, untranslated region with conserved  
320 termini of the open reading frames of the N and the NSs genes; CAT, chloramphenicol  
321 acetyltransferase gene; IGR, intergenic region, Ren-Luc, Renilla luciferase gene; HDR, hepatitis  
322 delta ribozyme; T7t, T7 RNA polymerase transcription termination sequence. These constructs are  
323 transfected into BSR-T7/5 cells and lead to production of L and N proteins as well as minigenome  
324 RNA, which are the minimal components for viral replication and transcription and form viral  
325 ribonucleoparticles (RNP). By the processes of viral genome replication antigenomic minigenome  
326 RNA and minigenome RNA are produced. Ren-Luc and CAT mRNAs are transcribed from the  
327 minigenome RNA and antigenomic minigenome RNA, respectively. The mRNAs contain 5'-cap  
328 structures obtained by the cap-snatching mechanism. A red dotted line indicates the targets of the  
329 riboprobe used for the northern blot analysis.

330

331 **Fig 2. Determination of transcription and replication activity of L protein mutants using the**  
332 **RVFV ambisense minigenome system. (A)** The activity of L protein mutants in viral replication  
333 and transcription was measured via Ren-Luc reporter gene expression. The Ren-Luc activity is  
334 shown in the bar graph (mean and standard deviation of standardized relative light units [sRLU] as  
335 a percentage of the wild-type (WT) in 3 to 14 independent transfection experiments). Signals for  
336 antigenomic RNA (position AG, representing viral replication) and Ren-Luc mRNA (position  
337 mRNA, representing viral transcription) were detected by northern blotting using a radiolabeled  
338 riboprobe hybridizing to the Ren-Luc gene. A defective L protein with a mutation in the catalytic  
339 site of the RNA-dependent RNA polymerase (D1133N) served as a negative control (neg.).  
340 Northern blots were performed two to three times per mutant and signals on northern blots were  
341 quantified using ImageJ2 software [20]. The quantitative data are presented in S1 Table. The  
342 methylene blue-stained 28S rRNA (28S) served as a marker for gel loading and RNA transfer.  
343 Additionally, immunoblot analysis of 3xFLAG-tagged L protein mutants is shown (L). Mutants

344 with an mRNA defective phenotype are marked with an asterisk. For experimental details see  
345 methods section. Dotted lines indicate removal of irrelevant lanes for presentation purposes.  
346 Original blots are included in the supporting information (S1 File). **(B)** Further L protein mutants  
347 were tested in the RVFV ambisense minigenome system essentially as described in (A). The bar  
348 graph represents mean and standard deviation of 6 independent measurements for the Ren-Luc  
349 activity. Northern blot analysis was performed twice; the figure depicts one representative  
350 experiment. The quantitative data are presented in S1 Table. Dotted lines indicate removal of  
351 irrelevant lanes for presentation purposes. Original blots are included in the supporting information  
352 (S1 File).

353

## 354 **Supporting data**

355 **S1 Table. Functional analysis of L protein mutants in the RVFV ambisense minigenome**  
356 **system.**

357 <sup>1</sup> For each mutant, 3 to 14 independent transfection experiments were performed. Ren-Luc values  
358 represent mean with standard deviation (n = 3-14). Northern blots were performed at least twice  
359 for every mutant. A selective defect in mRNA synthesis was defined as reduction in Ren-Luc  
360 level ( $\leq 1-35\%$ ) despite wild-type like antigenome synthesis (37–280%) and reduction of the  
361 mRNA-to-antigenome ratio ( $\leq 1-35\%$ ). Mutants with a selective defect in mRNA synthesis are  
362 shown in boldface on grey background.

363 <sup>2</sup> Standardized relative light unit (sRLU) value (wild-type L protein = 100%).

364 <sup>3</sup> sRLU value of mutant divided by sRLU value of the negative control mutant (D1133N)  
365 containing a mutation in the catalytic site of the RNA-dependent RNA polymerase.

366 <sup>4</sup> Antigenome signals in northern blots were quantified via intensity profiles using ImageJ2  
367 software (wild-type L protein = 100%). Background signals at the position of the antigenome of  
368 the respective northern blot were either subtracted from all other replication signals or data were  
369 evaluated without background subtraction (numbers in parentheses).

370 <sup>5</sup> RNA signals on northern blots were quantified using ImageJ2 software and the mRNA-to-  
371 antigenome signal ratio was calculated. The wild-type ratio was set at 100% for each experiment  
372 (i.e., the signal ratio of a mutant was normalized with the wild-type ratio) to render independent  
373 experiments comparable. Background signals at the position of the antigenome were subtracted  
374 from all other replication signals. Data without background correction are also shown (numbers in  
375 parentheses).

376

377 **S1 Figure. Alignment of C terminal sequences of phlebovirus L proteins.** The figure presents a  
378 secondary structure-guided alignment of the C-terminal sequences of L proteins from 22  
379 phleboviruses (Uniprot accession numbers are given). The alignment was created by manually  
380 combining results of ClustalOmega and PRALINE programs [24-27] and data are presented by  
381 ESPript (<http://esprict.ibcp.fr>) [28]. The corresponding secondary structure predictions were  
382 calculated by Jpred4 [29] and are depicted below the sequences ( $\beta$ -sheets as arrows,  $\alpha$ -helices as  
383 barrels, loops as lines). All positions refer to RVFV strain ZH-501 full-length L protein. Impact of  
384 residue-to-alanine substitution on RVFV L protein activity is indicated by triangles above the  
385 sequences (white, mild or no effect; grey, general defect in L protein activity; red, selective defect  
386 in viral transcription).

387

388 **S1 File. Original northern and western blots.** Lanes of northern blots that have been used for  
389 quantification and statistical analysis (included in S1 Table) are labeled with the respective L  
390 protein mutation, "WT" for L protein wild-type, or "neg." for negative control mutant D1133N.  
391 Lanes of northern blots and methylene blue stained northern blot membranes presented in Fig 2 are  
392 framed by dotted rectangles. Western blot bands used in Fig 2 are also framed by dotted rectangles  
393 and labeled.





**A**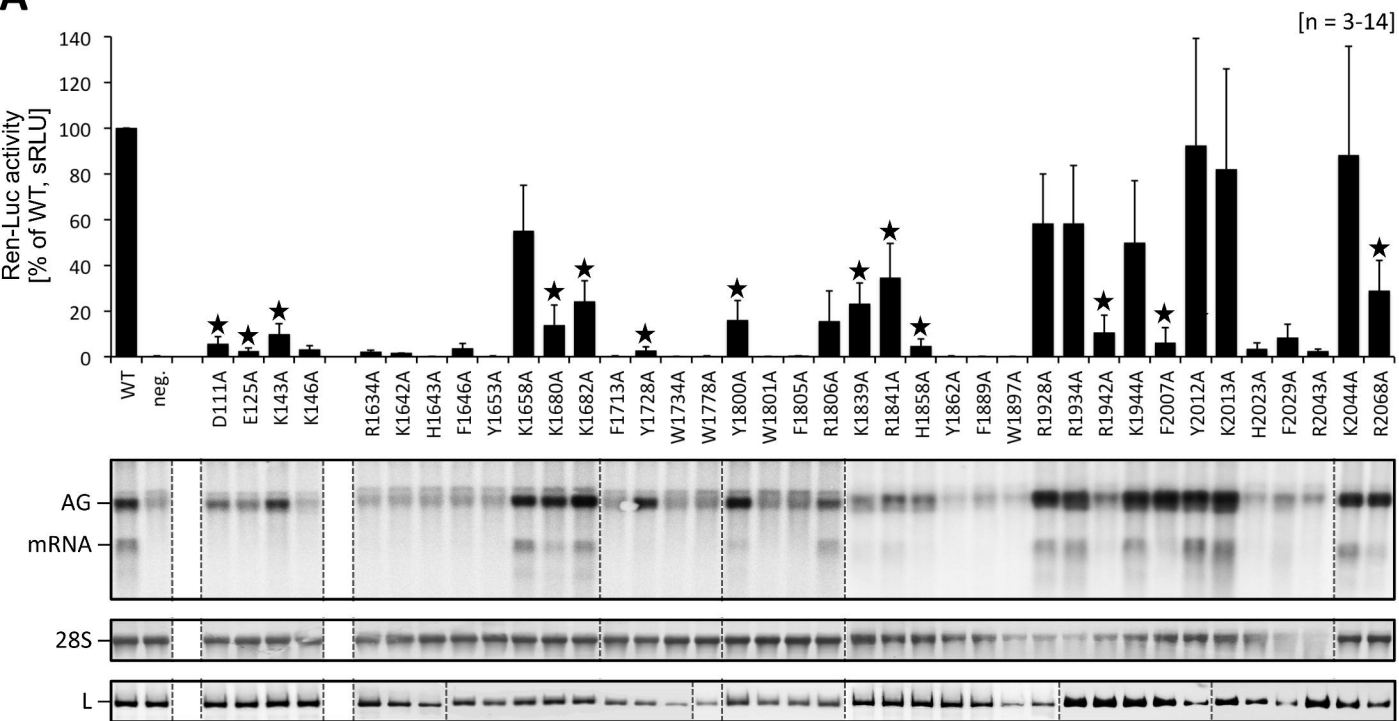**B**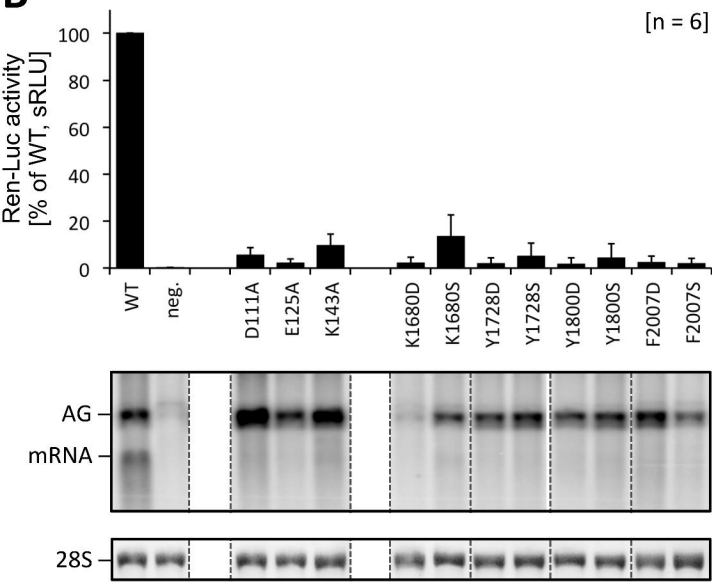

Source: https://www.biorxiv.org/content/10.1101/556738v2.full.pdf
